# Supplementary material
Source: publisher figshare collection journal article supplement (https://f1000.figshare.com/articles/dataset/_/954933)

Dynein  
(Midbrain)

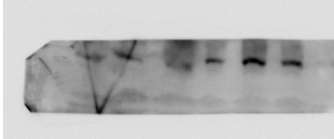

Dynein  
(Midbrain)

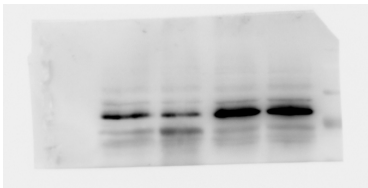

Dynein  
(Striatum)

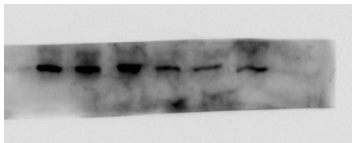

Supplement: Supplementary file 1 [file 1]
